# Supplementary material
Source: publisher figshare collection journal article supplement (https://acs.figshare.com/ndownloader/files/4955164)
Supplement: Supplementary file 1 [file 4955164]

**Supporting Information for:**

**Binding of clinical inhibitors to a model precursor of a rationally selected multidrug resistant HIV-1 protease is significantly weaker than that to the released mature enzyme**

Joon Park<sup>1#</sup>, Jane M. Sayer<sup>1</sup>, Annie Aniana<sup>1</sup>, Xiaxia Yu<sup>2</sup>, Irene T. Weber<sup>3</sup>, Robert W. Harrison<sup>2</sup>  
and John M. Louis<sup>1#\*</sup>

<sup>1</sup>Laboratory of Chemical Physics, National Institute of Diabetes and Digestive and Kidney Diseases, National Institutes of Health, DHHS, Bethesda, Maryland 20892; Departments of computer Science<sup>2</sup> and Biology<sup>3</sup>, Georgia State University, Atlanta, GA30303

# Equally contributed to the experimental work

\*Correspondence: John M. Louis, Building 5, Room B2-29, LCP, NIDDK, NIH, Bethesda, MD 20892-0520, Tel. 301 594-3122; Fax. 301 480-4001; E-mail: [johnl@niddk.nih.gov](mailto:johnl@niddk.nih.gov)

Table S1. Selected mutations in PR20<sup>1,2</sup> compared with PR<sup>S17</sup> and PR22<sup>3</sup>, and their predicted resistance to clinical PIs. The color scheme used for the inhibitors corresponds to the predicted significance of each substitution mutation (columns 2, 4 and 6) to impact resistance to each drug (columns 3, 5 and 7), in decreasing order, as bold red > bold black > plain black. Mutations in PR<sup>S17</sup> and PR22 matching those in PR20 are in red and conservative substitutions in PR<sup>S17</sup> and PR22 relative to PR20 are in blue. Dashes indicate residues identical to the wild type.

| Residue (wild-type) | Mutations in PR20 | Associated Drug Resistance                           | Mutations in PR <sup>S17</sup> | Associated Drug Resistance                      | Mutations in PR22 | Associated Drug Resistance                      |
|---------------------|-------------------|------------------------------------------------------|--------------------------------|-------------------------------------------------|-------------------|-------------------------------------------------|
| T4                  |                   |                                                      |                                |                                                 | S                 | Undefined                                       |
| L10                 | <b>F</b>          | APV, ATV, LPV, NFV <sup>b</sup>                      | I                              | APV, ATV, LPV, NFV, IDV, SQV <sup>b</sup>       | V                 | APV, ATV, LPV, IDV, SQV <sup>b</sup>            |
| I13                 | <b>V</b>          | Undefined                                            | -                              |                                                 | A                 | Undefined                                       |
| K14                 | -                 |                                                      | -                              |                                                 | R                 | Undefined                                       |
| I15                 | <b>V</b>          | Undefined                                            | -                              |                                                 | -                 |                                                 |
| K20                 | -                 |                                                      | R                              | ATV, LPV, IDV <sup>b</sup>                      | I                 | ATV <sup>b</sup>                                |
| A22                 | -                 |                                                      | -                              |                                                 | V                 | Undefined                                       |
| D30                 | <b>N</b>          | <b>NFV<sup>a</sup></b>                               | -                              |                                                 | -                 |                                                 |
| V32                 | <b>I</b>          | <b>APV, ATV, DRV, LPV, IDV<sup>a</sup></b>           | -                              |                                                 | -                 |                                                 |
| L33                 | <b>F</b>          | <b>APV, ATV, DRV, LPV, NFV<sup>a</sup></b>           | -                              |                                                 | I                 | ATV <sup>b</sup>                                |
| E35                 | <b>D</b>          | Undefined                                            | <b>D</b>                       | Undefined                                       | <b>D</b>          | Undefined                                       |
| M36                 | <b>I</b>          | ATV, NFV, IDV <sup>b</sup>                           | <b>I</b>                       | ATV, NFV, IDV <sup>b</sup>                      | <b>I</b>          | ATV, NFV, IDV <sup>b</sup>                      |
| S37                 | <b>N</b>          | Undefined                                            | <b>D</b>                       | Undefined                                       | <b>D</b>          | Undefined                                       |
| R41                 | -                 |                                                      | -                              |                                                 | K                 | Undefined                                       |
| K43                 | -                 |                                                      | -                              |                                                 | S                 | Undefined                                       |
| M46                 | -                 |                                                      | L                              | <b>APV, ATV, LPV, NFV, IDV<sup>a</sup></b>      | -                 |                                                 |
| I47                 | <b>V</b>          | <b>APV, ATV, DRV, LPV, NFV, IDV<sup>a</sup></b>      | -                              |                                                 | -                 |                                                 |
| G48                 | -                 |                                                      | V                              | <b>ATV, LPV, NFV, SQV<sup>a</sup></b>           | A                 | Undefined                                       |
| I54                 | <b>L</b>          | <b>APV, ATV, DRV, LPV, NFV, IDV, SQV<sup>a</sup></b> | <b>V</b>                       | <b>APV, ATV, LPV, NFV, IDV, SQV<sup>a</sup></b> | <b>V</b>          | <b>APV, ATV, LPV, NFV, IDV, SQV<sup>a</sup></b> |
| Q58                 | <b>E</b>          | TPV                                                  | -                              |                                                 | -                 |                                                 |
| D60                 | -                 |                                                      | E                              | ATV <sup>b</sup>                                | -                 |                                                 |
| I62                 | <b>V</b>          | ATV, SQV <sup>b</sup>                                | <b>V</b>                       | ATV, SQV <sup>b</sup>                           | -                 |                                                 |
| L63                 | <b>P</b>          | LPV <sup>b</sup>                                     | <b>P</b>                       | LPV <sup>b</sup>                                | -                 |                                                 |
| I66                 | -                 |                                                      | -                              |                                                 | F                 | Undefined                                       |
| H69                 | -                 |                                                      |                                |                                                 | K                 | TPV <sup>b</sup>                                |
| A71                 | <b>V</b>          | ATV, LPV, NFV, IDV, SQV <sup>b</sup>                 | <b>V</b>                       | ATV, LPV, NFV, IDV, SQV <sup>b</sup>            | -                 |                                                 |
| I72                 | -                 |                                                      | V                              | Undefined                                       | -                 |                                                 |
| T74                 | -                 |                                                      | -                              |                                                 | S                 | Undefined                                       |
| V77                 | -                 |                                                      | I                              | NFV, IDV, SQV <sup>b</sup>                      | -                 |                                                 |
| V82                 | -                 |                                                      | S                              | APV, ATV, <b>LPV, NFV, IDV<sup>a</sup></b>      | A                 | APV, ATV, <b>LPV, NFV, IDV, SQV<sup>a</sup></b> |

|     |   |                                                |   |                                           |   |                                                |
|-----|---|------------------------------------------------|---|-------------------------------------------|---|------------------------------------------------|
| I84 | V | APV, ATV, DRV, LPV, NFV, IDV, SQV <sup>a</sup> | - |                                           | V | APV, ATV, DRV, LPV, NFV, IDV, SQV <sup>a</sup> |
| N88 | D | NFV (together with D30N) <sup>a</sup>          | - |                                           | - |                                                |
| L89 | T | Undefined                                      | - |                                           | I | TPV <sup>b</sup>                               |
| L90 | M | APV, ATV, LPV, NFV, IDV, SQV <sup>a</sup>      | M | APV, ATV, LPV, NFV, IDV, SQV <sup>a</sup> | M | APV, ATV, LPV, NFV, IDV, SQV <sup>a</sup>      |
| T91 | - |                                                | - |                                           | S | Undefined                                      |
| I93 | - |                                                | L | ATV <sup>b</sup>                          | - |                                                |

Drug resistance data were compiled from <sup>a</sup>Stanford University drug resistance database (<http://hivdb.stanford.edu/DR/PIResiNote.html>) and

<sup>b</sup>Wensing A. M. et al.<sup>4</sup>

Figure S1

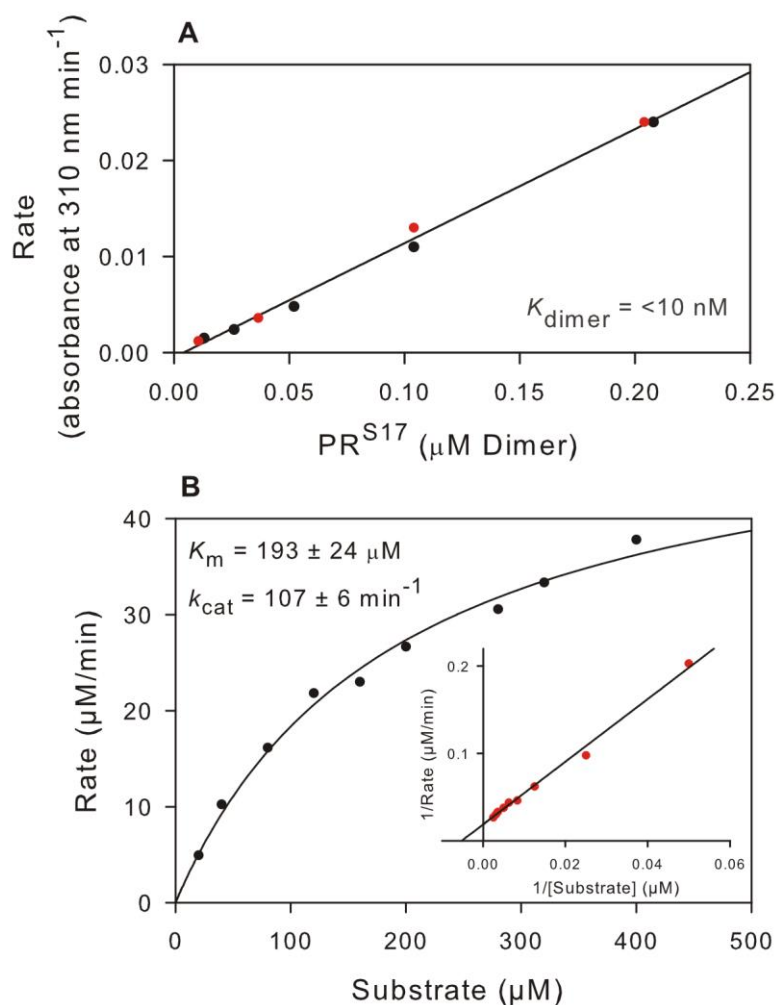

Dimer dissociation constant ( $K_{\text{dimer}}$ ) and kinetic parameters measured for PR<sup>S17</sup> in 50 mM sodium acetate, pH 5, containing 250 mM NaCl (buffer B) at 28 °C. (A) Dependence of the initial rate of hydrolysis of the chromogenic substrate on PR<sup>S17</sup> concentration. Red and black symbols denote duplicate experiments. (B) Michaelis-Menten and Lineweaver-Burk (inset) plots for hydrolysis of the chromogenic substrate catalyzed by 0.5 μM PR<sup>S17</sup> (as dimer) in buffer B. Kinetic parameters  $K_m$  and  $k_{\text{cat}}$  were determined by curve fitting using the enzyme kinetics module of SigmaPlot 10.

Figure S2

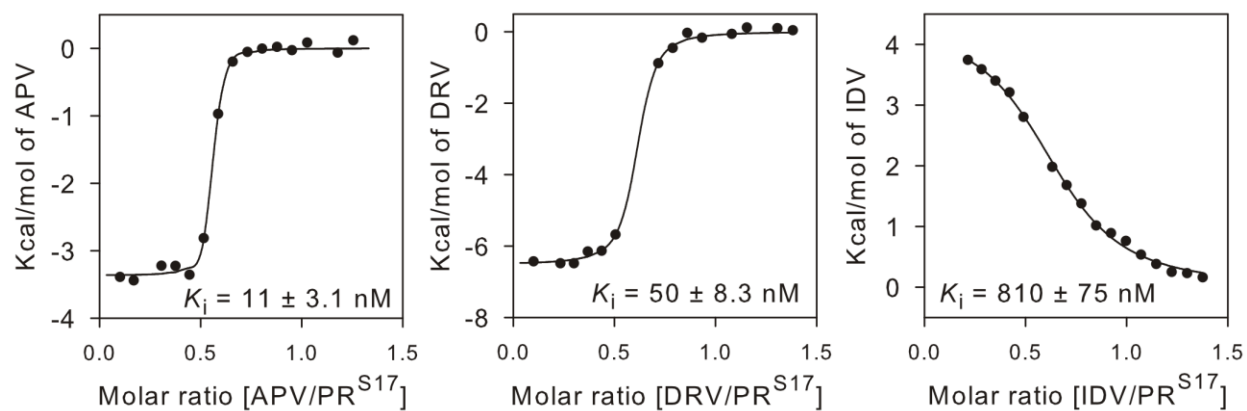

$K_i$  determination for the binding of APV, DRV and IDV to PR<sup>S17</sup> by ITC in buffer A (50 mM sodium acetate, pH 5) at 28 °C. The values shown correspond to  $1/K_{\text{association}}$  derived by curve fitting using Origin ITC software.

Figure S3

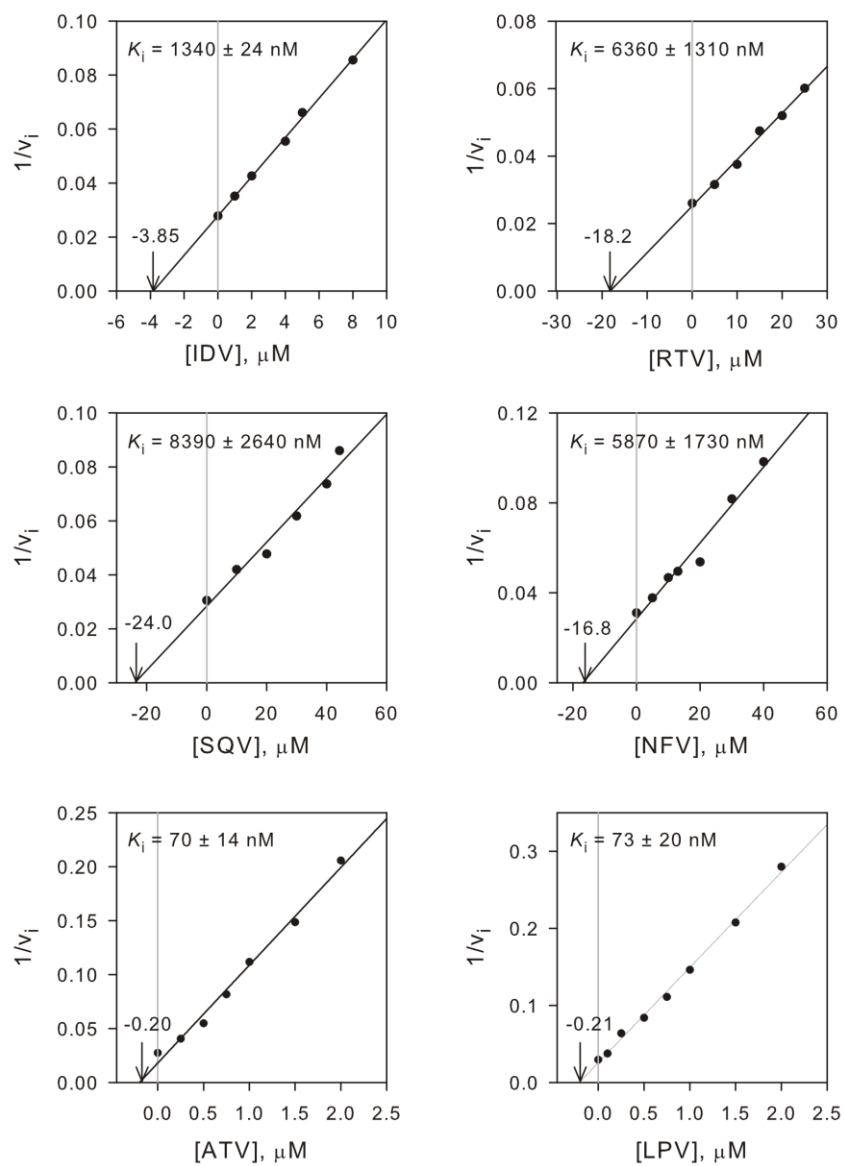

Kinetic determination of  $IC_{50}$  and  $K_i$  for the binding of selected inhibitors to mature PR<sup>S17</sup> in buffer B (50 mM sodium acetate, 250 mM NaCl, pH 5) at 28 °C. Arrows indicate  $IC_{50}$ .  $K_i$  values (shown in Table 1) were calculated from the relationship  $K_i = IC_{50}/(1 + [substrate]/K_m)$ .

Figure S4

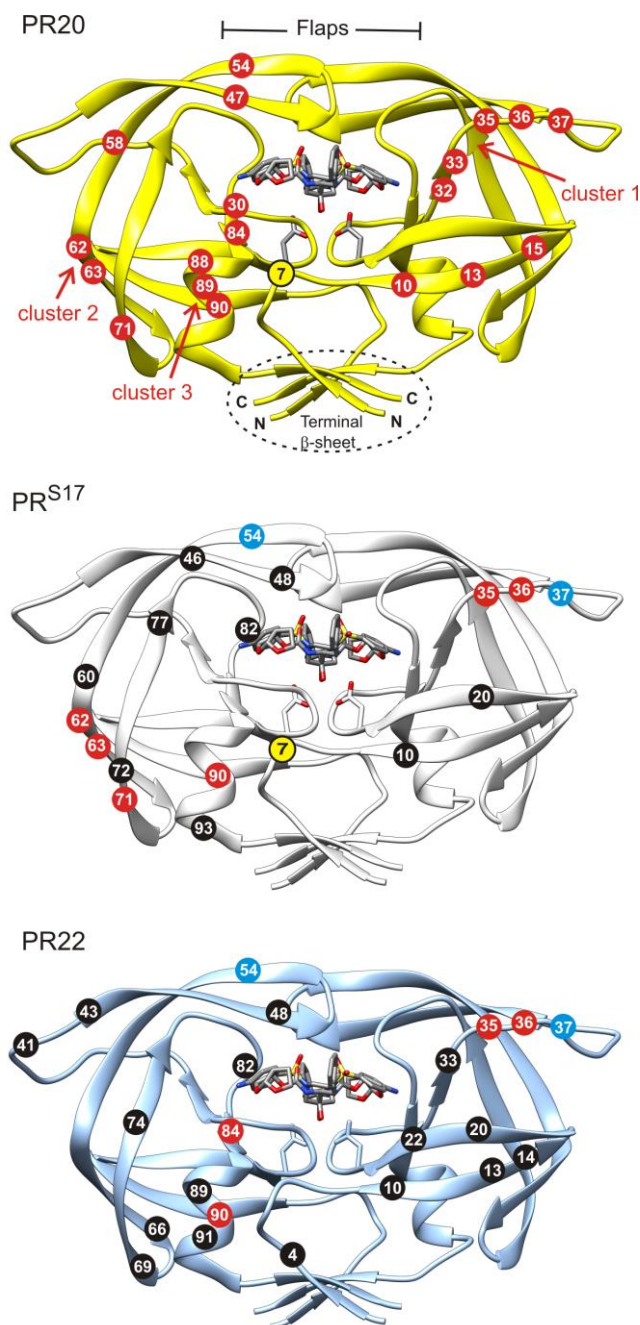

Comparison of mutations of PR<sup>S17</sup> with PR20<sup>1,2</sup> and PR22.<sup>3</sup> Ribbon representation (3UCB<sup>5</sup>) showing location of 19 (top), 17 (middle) and 22 (bottom) mutations in PR20, PR<sup>S17</sup> and PR22, respectively. Red and blue residue positions in PR<sup>S17</sup> and PR22 denote identical and conservative substitutions, respectively, matching those in PR20. Yellow (Q7K) substitution is introduced in PR20 and PR<sup>S17</sup> constructs to restrict autoproteolysis (self-degradation).

## REFERENCES

1. Dierynck, I., De Wit, M., Gustin, E., Keuleers, I., Vandersmissen, J., Hallenberger, S., and Hertogs, K. (2007) Binding kinetics of darunavir to human immunodeficiency virus type 1 protease explain the potent antiviral activity and high genetic barrier. *J. Virol.* 81, 13845-13851.
2. Louis, J. M., Aniana, A., Weber, I. T., and Sayer, J. M. (2011) Inhibition of autoprocessing of natural variants and multidrug resistant mutant precursors of HIV-1 protease by clinical inhibitors. *Proc. Natl. Acad. Sci. U. S. A* 108, 9072-9077.
3. Kozisek, M., Henke, S., Saskova, K. G., Jacobs, G. B., Schuch, A., Buchholz, B., Muller, V., Krausslich, H. G., Rezacova, P., Konvalinka, J., and Bodem, J. (2012) Mutations in HIV-1 gag and pol compensate for the loss of viral fitness caused by a highly mutated protease. *Antimicrob. Agents Chemother.* 56, 4320-4330.
4. Wensing, A. M., Calvez, V., Gunthard, H. F., Johnson, V. A., Paredes, R., Pillay, D., Shafer, R. W., and Richman, D. D. (2014) 2014 Update of the drug resistance mutations in HIV-1. *Top. Antivir. Med.* 22, 642-650.
5. Agniswamy, J., Shen, C. H., Aniana, A., Sayer, J. M., Louis, J. M., and Weber, I. T. (2012) HIV-1 protease with 20 mutations exhibits extreme resistance to clinical inhibitors through coordinated structural rearrangements. *Biochemistry* 51, 2819-2828.
